# Supplementary material
Source: PubMed Central journal article supplement (PMC1858660)
Supplement: NIHMS18882-supplement-01.pdf [file NIHMS18882-supplement-01.pdf]

## SUPPLEMENTARY DATA

### Experimental Procedures

#### Yeast Strains

All strains used in this study are listed in supplemental Table S1. Strains containing deletions of *EDC3*, *UPF1*, *DCP1*, *XRN1*, *SKI2*, *SKI7*, *CCR4*, or *RRP6* were constructed by gene replacement (Guthrie and Fink, 1991), using DNA fragments harboring the corresponding null alleles. Each genomic DNA deletion was confirmed by PCR analysis. Strains containing deletions of *DHH1*, *PAT1*, *LSM1*, or *LSM7* were purchased from Open Biosystems. Strains harboring the temperature-sensitive *rpb1-1*, *prt1-1*, or *sup45-2* alleles were constructed by the pop-in and pop-out technique (Guthrie and Fink, 1991). Strains harboring the temperature-sensitive *yra1-1* allele were constructed by plasmid shuffling (Guthrie and Fink, 1991).

#### Plasmids

All plasmids used in this study are listed in Table S2. *YRA1* exon1, intron, or exon2 chimeric alleles were all constructed through *in vivo* recombination in yeast cells as described previously (He et al., 1996). *YRA1* alleles harboring deletions of exon1, intron, or exon2 sequences, or containing insertions of a stem-loop structure, were generated by PCR and molecular cloning. *YRA1* alleles harboring mutations in the *YRA1* translation initiation codon, the 5' splice site, the branch-point region, or the 3' splice site were generated using the QuikChange Site-Directed Mutagenesis Kit (Stratagene). All *YRA1* alleles were confirmed by DNA sequencing.

## **Oligonucleotides**

The oligonucleotides used in this study were obtained from Operon, Inc., and are listed in Table S3.

## **Cell Growth Conditions**

Cells were grown in YPD medium (Microarray analysis and Figures 1, 2, 3B, and 6), or in synthetic complete (SC) medium lacking tryptophan (Figures 3C, 4, 5A, 5B, 5C, and 5D-right side), histidine (Figure 7A and 7C), uracil and tryptophan (Figure 5D-left side), or histidine and tryptophan (Figure 7D and 7E) to select for plasmids. Cultures (10 ml) not involving drug treatment or temperature shifts were grown at 30°C to an OD<sub>600</sub> of 0.7 and harvested by centrifugation. Cell pellets were frozen on dry ice and then stored at -80°C until RNA was isolated. Cultures involving drug treatment were grown at 30°C to an OD<sub>600</sub> of 0.7 in a large volume and then concentrated five-fold in the same medium. Where appropriate, the following were added to concentrated cultures: cycloheximide (100 µg/ml), leptomicin (100 ng/ml), or thiolutin (15µg/ml). Drug-treated cells (2ml) were harvested at different time points. For temperature shifts, cells were first grown at 25°C and then treated as described previously (He and Jacobson, 1995).

## **Microarray Analysis**

Five independent expression profiling experiments were carried out for isogenic wild-type (HFY114) and *edc3Δ* (CFY25) strains using Affymetrix Yeast Genome S98 Arrays. Microarray procedures, including RNA isolation, cRNA preparation, microarray hybridization, and data analysis, were as previously described (He et al., 2003), with the

following modifications: First, all microarrays were analyzed with Affymetrix Microarray Suite 5.0 software. Second, a transcript was considered to be differentially expressed if it met two of three previously defined criteria, i.e., it must have an absolute change threshold of 200 units and a change P value  $\leq 0.05$ . The entire data set can be found at: <http://jacobsonlab.umassmed.edu/cgi-bin/pubcontents.cgi?pubcontents=2006-Feng>.

### **Yeast Two-hybrid Analysis**

Two-hybrid interactions between full-length Crm1p fused to the LexA DNA-binding domain and full-length Edc3p fused to the Gal4p activation domain were assayed as described previously (He et al., 1997).

## **Results**

### **Identification of Transcripts Differentially Expressed in *edc3Δ* Cells**

Five independent expression profiling experiments were carried out with *EDC3* and *edc3Δ* strains and differentially expressed transcripts were initially identified based on three stringent criteria. First, the hybridization signal values of a specific transcript in the wild-type and the *edc3Δ* strains had to have a relative change of at least 2-fold and an absolute change of at least 200 units. Second, these changes had to be reproducible in at least 80% of the independent replicate experiments. Third, these changes had to demonstrate statistically significant P values  $\leq 0.05$ . To our surprise, this data analysis revealed that, among the 7839 potential transcripts analyzed, only a single transcript

met these criteria. In *edc3Δ* cells, the *EDC3* mRNA itself was decreased more than 10-fold relative to its level in wild-type cells (Table 4S), consistent with the fact that the *edc3Δ* strain harbors a complete *EDC3* deletion. Although this observation validated the overall experiment, we reasoned that our stringent criteria may have overlooked at least two classes of transcripts. For example, highly expressed transcripts are prone to signal saturation and intron-containing transcripts might be missed since the oligonucleotide probes on our arrays do not differentiate intron-containing pre-mRNA signals from mRNA signals. We, therefore, lowered the analysis stringency by eliminating the minimum 2-fold change requirement and reanalyzed our data. This new analysis identified four additional differentially expressed transcripts in the *edc3Δ* strain: two transcripts showed increased expression and two others showed decreased expression (Table 4S). One of the up-regulated transcripts is encoded by the *RPS28B* gene and codes for a 40S ribosomal protein (Lecompte et al., 2002). The other up-regulated transcript is encoded by the *YRA1* gene and codes for an hnRNP-like protein (Yra1p) involved in an early stage of mRNA export (Portman et al., 1997; Strasser and Hurt, 2000). The two down-regulated transcripts, encoded by the *URA1* and *URA4* genes, may well reflect our use of the *URA3* gene as a selectable marker for replacement of the *EDC3* coding region. *URA1*, *URA3*, and *URA4* all code for enzymes involved in uracil biosynthesis (Denis-Duphil, 1989) and the decreased expression of *URA1* and *URA4* transcripts in the *edc3Δ* strain is presumably related to the expression of *URA3*, not to the deletion of *EDC3*.

### **Inactivation of Yra1p Promotes *YRA1* Pre-mRNA Splicing**

To further understand the role of Yra1p in its autoregulation, we examined the effects of mutations in the *YRA1* gene on levels of *YRA1* pre-mRNA and mRNA in an *edc3Δ* background. We reasoned that some loss of function mutations may also fail to autoregulate. We first analyzed *yra1-1*, a ts allele whose encoded protein contains multiple amino acid substitutions and is defective in mRNA export even when cells are grown at room temperature (Strasser and Hurt, 2000). As shown in Figure 2S, when cells were grown at 25°C (t=0) or were shifted to 37°C for 30 min, *edc3Δyra1-1* cells accumulated significantly lower levels of *YRA1* pre-mRNA than *edc3ΔYRA1* cells. In contrast, under these two growth conditions, *edc3Δyra1-1* cells accumulated significantly higher levels of *YRA1* mRNA than *edc3ΔYRA1* cells. The lower *YRA1* pre-mRNA to mRNA ratios in *edc3Δyra1-1* cells indicate that the *yra1-1* allele is defective in autoregulation and suggest that Yra1p regulates its own expression by inhibiting *YRA1* pre-mRNA splicing.

## FIGURE 1S

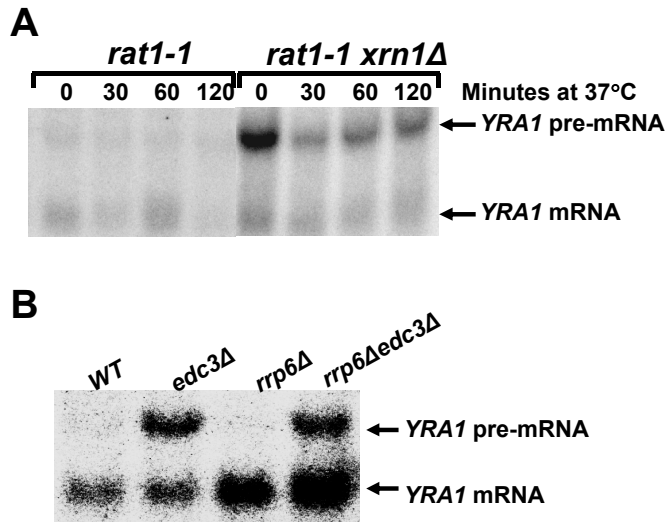

**Figure 1S. Inactivation of Ra1t1p or Depletion of Rrp6p Does Not Affect the Accumulation of *YRA1* Pre-mRNA.** A. Effect of inactivation of Rat1p on levels of *YRA1* pre-mRNA and mRNA. *Rat1-1* or *rat1-1xrn1Δ* cells were grown in SC minus uracil medium at 25°C and then shifted to 37°C for 30, 60, and 120 min. The levels of *YRA1* pre-mRNA and mRNA were analyzed by northern blotting. B. Effect of depletion of Rrp6p on the levels of *YRA1* pre-mRNA and mRNA. Cells of the indicated genotypes were grown in YEPD medium and the levels of *YRA1* pre-mRNA and mRNA in these cells were analyzed by northern blotting. Note that *rrp6Δ* cells accumulated higher levels of *YRA1* mRNA than *RRP6* cells. The simplest explanation for this observation is that, in wild-type cells, a fraction of the *YRA1* pre-mRNA that is committed to the splicing pathway is degraded by the nuclear exosome.

## FIGURE 2S

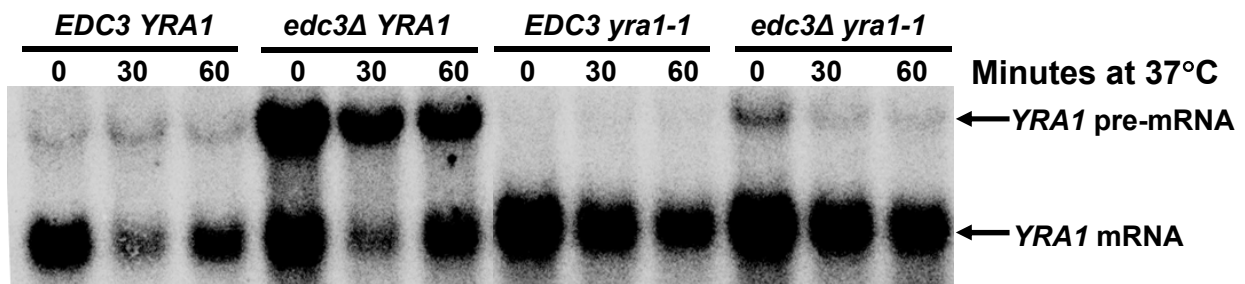

**Figure 2S. Inactivation of Yra1p Promotes *YRA1* Pre-mRNA Splicing.** Cells of the indicated genotypes were grown in SC minus uracil medium at 25°C and then shifted to 37°C. The levels of *YRA1* pre-mRNA and mRNA were analyzed by northern blotting.

## FIGURE 3S

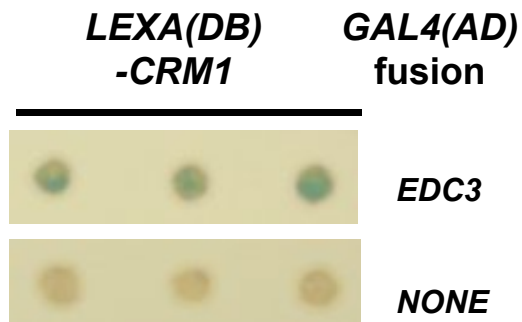

**Figure 3S. Crm1p Interacts With Edc3p in the Yeast Two-hybrid System.** Yeast plasmids harboring LexA(DB)-*CRM1* and Gal4(AD)-*EDC3* fusions were co-transformed into the L40 tester strain. Transformants were selected and the  $\beta$ -galactosidase activity of individual transformants was assayed on plates containing X-Gal.



## Figure 4S

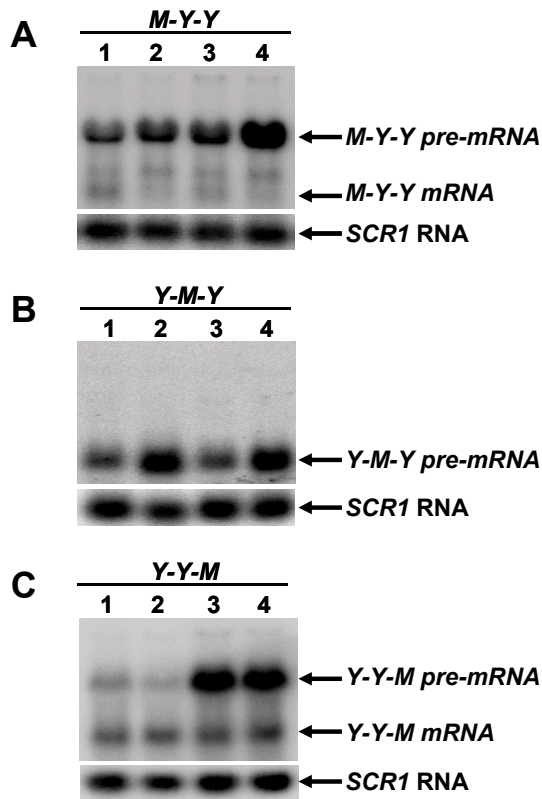

**Figure 4S. Cis-acting Determinants of *YRA1* Expression.** Alterations of *YRA1* pre-mRNA and mRNA expression mediated by: (A) replacing *YRA1* exon1 with *MER2* exon1, (B) replacing the *YRA1* intron with the *MER2* intron; and (C) replacing *YRA1* exon2 with *MER2* exon2 were analyzed. YCp low-copy plasmids harboring a chimeric allele (depicted above the corresponding blots) were introduced into wild-type (1), *upf1Δ* (2), *edc3Δ* (3), or *upf1Δ edc3Δ* (4) strains and the levels of the respective pre-mRNAs and mRNAs encoded by these alleles were analyzed by northern blotting. Blots A, B, and C were hybridized to *MER2* exon1, intron, or exon2-specific probes, respectively. The positions of chimeric pre-mRNAs and mRNAs are indicated. Y: *YRA1*, and M: *MER2*. Blots were hybridized to a *SCR1* probe to serve as a loading control.

**Table 1S. Yeast Strains Used in this study**

| Strain       | Genotype                                                                                               | References                  |
|--------------|--------------------------------------------------------------------------------------------------------|-----------------------------|
| HFY114       | <i>MATa ade2-1 his3-11, 15 leu2-3, 112 trp1-1 ura3-1 can1-100 UPF1 NMD2 UPF3</i>                       | (He et al., 2003)           |
| HFY871       | <i>MATa ade2-1 his3-11, 15 leu2-3, 112 trp1-1 ura3-1 can1-100 upf1::HIS3 NMD2 UPF3</i>                 | (He et al., 2003)           |
| HFY116       | <i>MATa ade2-1 his3-11, 15 leu2-3, 112 trp1-1 ura3-1 can1-100 UPF1 nmd2::HIS3 UPF3</i>                 | (He et al., 2003)           |
| HFY881       | <i>MATa ade2-1 his3-11, 15 leu2-3, 112 trp1-1 ura3-1 can1-100 UPF1 NMD2 upf3::HIS3</i>                 | (He et al., 2003)           |
| HFY1067      | <i>MATa ade2-1 his3-11, 15 leu2-3, 112 trp1-1 ura3-1 can1-100 UPF1 NMD2 UPF3 dop1::URA3</i>            | (He et al., 2003)           |
| HFY1080      | <i>MATa ade2-1 his3-11, 15 leu2-3, 112 trp1-1 ura3-1 can1-100 UPF1 NMD2 UPF3 xrm1::ADE2</i>            | (He et al., 2003)           |
| CFY25        | <i>MATa ade2-1 his3-11, 15 leu2-3, 112 trp1-1 ura3-1 can1-100 UPF1 NMD2 UPF3 edc3::URA3</i>            | This study                  |
| SY158        | <i>MATa ade2-1 his3-11, 15 leu2-3, 112 trp1-1 ura3-1 can1-100 UPF1 NMD2 UPF3 edc3::URA3 upf1::HIS3</i> | This study                  |
| SY9          | <i>MATa ade2-1 his3-11, 15 leu2-3, 112 trp1-1 ura3-1 can1-100 UPF1 NMD2 UPF3 rpb1-1</i>                | This study                  |
| SY43         | <i>MATa ade2-1 his3-11, 15 leu2-3, 112 trp1-1 ura3-1 can1-100 UPF1 NMD2 UPF3 edc3::URA3 rpb1-1</i>     | This study                  |
| HFY1170      | <i>MATa ade2-1 his3-11, 15 leu2-3, 112 trp1-1 ura3-1 can1-100 UPF1 NMD2 UPF3 ski2::URA3</i>            | This study                  |
| SY17         | <i>MATa ade2-1 his3-11, 15 leu2-3, 112 trp1-1 ura3-1 can1-100 UPF1 NMD2 UPF3 ski7::URA3</i>            | This study                  |
| SY21         | <i>MATa ade2-1 his3-11, 15 leu2-3, 112 trp1-1 ura3-1 can1-100 UPF1 NMD2 UPF3 ski2::URA3 ski7::ADE2</i> | This study                  |
| CFY13        | <i>MATa ade2-1 his3-11, 15 leu2-3, 112 trp1-1 ura3-1 can1-100 UPF1 NMD2 UPF3 prt1-1</i>                | This study                  |
| HFY1218      | <i>MATa ade2-1 his3-11, 15 leu2-3, 112 trp1-1 ura3-1 can1-100 UPF1 NMD2 UPF3 sup45-2</i>               | This study                  |
| SY60         | <i>MATa ade2-1 his3-11, 15 leu2-3, 112 trp1-1 ura3-1 can1-100 UPF1 NMD2 UPF3 edc3::URA3 xrm1::ADE2</i> | This study                  |
| SY110        | <i>MATa ade2-1 his3-11, 15 leu2-3, 112 trp1-1 ura3-1 can1-100 UPF1 NMD2 UPF3 ccr4::LEU2</i>            | This study                  |
| SY114        | <i>MATa ade2-1 his3-11, 15 leu2-3, 112 trp1-1 ura3-1 can1-100 UPF1 NMD2 UPF3 edc3::URA3 ccr4::LEU2</i> | This study                  |
| DAt1-1       | <i>MATa ura3-52 trp1-D63 leu2-D1 rat1-1</i>                                                            | (He and Jacobson, 2001)     |
| HFY1102      | <i>MATa ura3-52 trp1-D63 leu2-D1 rat1-1 xrm1::URA3</i>                                                 | (He and Jacobson, 2001)     |
| SY573        | <i>MATa ade2-1 his3-11, 15 leu2-3, 112 trp1-1 ura3-1 can1-100 UPF1 NMD2 UPF3 rrp6::LEU2</i>            | This study                  |
| SY577        | <i>MATa ade2-1 his3-11, 15 leu2-3, 112 trp1-1 ura3-1 can1-100 UPF1 NMD2 UPF3 edc3::URA3 rrp6::LEU2</i> | This study                  |
| BY4741       | <i>MATa hisΔ1 leu2Δ0 met15Δ0 ura3Δ0</i>                                                                | open biosystems             |
| SY160        | <i>MATa hisΔ1 leu2Δ0 met15Δ0 ura3Δ0 edc3::URA3</i>                                                     | This study                  |
| BY1301       | <i>MATa hisΔ1 leu2Δ0 met15Δ0 ura3Δ0 lsm1::kanMX</i>                                                    | open biosystems             |
| SY176        | <i>MATa hisΔ1 leu2Δ0 met15Δ0 ura3Δ0 lsm1::kanMX edc3::URA3</i>                                         | This study                  |
| BY7383       | <i>MATa hisΔ1 leu2Δ0 met15Δ0 ura3Δ0 lsm7::kanMX</i>                                                    | open biosystems             |
| SY172        | <i>MATa hisΔ1 leu2Δ0 met15Δ0 ura3Δ0 lsm7::kanMX edc3::URA3</i>                                         | This study                  |
| BY5797       | <i>MATa hisΔ1 leu2Δ0 met15Δ0 ura3Δ0 pat1::kanMX</i>                                                    | open biosystems             |
| SY164        | <i>MATa hisΔ1 leu2Δ0 met15Δ0 ura3Δ0 pat1::kanMX edc3::URA3</i>                                         | This study                  |
| BY3858       | <i>MATa hisΔ1 leu2Δ0 met15Δ0 ura3Δ0 dhh1::kanMX</i>                                                    | open biosystems             |
| SY214        | <i>MATa hisΔ1 leu2Δ0 met15Δ0 ura3Δ0 dhh1::kanMX edc3::URA3</i>                                         | This study                  |
| yra1 shuffle | <i>MATa ade2 his3 leu2 trp1 ura3 yra1::HIS3 pRS316-YRA1</i>                                            | (Strasser and Hurt, 2000)   |
| SY98         | <i>MATa ade2 his3 leu2 trp1 ura3 yra1::HIS3 pRS314-yra1-1</i>                                          | This study                  |
| SY131        | <i>MATa ade2 his3 leu2 trp1 ura3 yra1::HIS3 pRS314-yra1-1 edc3::URA3</i>                               | This study                  |
| SY529        | <i>MATa ade2 his3 leu2 trp1 ura3 yra1::HIS3 pRS316-YRA1 edc3::LEU2</i>                                 | This study                  |
| FSY1135      | <i>MATa ade2 his3 leu2 trp1 ura3 yra1::HIS3 yra2::kan pRS316-YRA1</i>                                  | (Zenklusen et al., 2001)    |
| SY606        | <i>MATa ade2 his3 leu2 trp1 ura3 yra1::HIS3 yra2::kan yeplac112-YRA2</i>                               | This study                  |
| SY621        | <i>MATa ade2 his3 leu2 trp1 ura3 yra1::HIS3 yra2::kan yeplac112-YRA2 edc3::LEU2</i>                    | This study                  |
| MNY12        | <i>MATa his3 leu2 trp1 ura3 crm1::kanR pRS313-GFP-crm1(T539C)</i>                                      | (Neville and Rosbash, 1999) |
| SY614        | <i>MATa his3 leu2 trp1 ura3 crm1::kanR pRS313-GFP-crm1(T539C) edc3::URA3</i>                           | This study                  |
| SY834        | <i>MATa his3 leu2 trp1 ura3 crm1::kanR pRS313-GFP-crm1(T539C) rrp6::LEU2</i>                           | This study                  |
| SY838        | <i>MATa his3 leu2 trp1 ura3 crm1::kanR pRS313-GFP-crm1(T539C) edc3::URA3 rrp6::LEU2</i>                | This study                  |
| SY571        | <i>MATa or α ade2 his3 15 leu2 trp1 ura3 mex67::HIS3 pRS316-URA3-MEX67</i>                             | From Dr. Rosbash            |
| SY572        | <i>MATa ade2 his3 15 leu2 trp1 ura3 mex67::HIS3 pRS314-mex67-5</i>                                     | From Dr. Rosbash            |
| SY1902       | <i>MATa or α ade2 his3 15 leu2 trp1 ura3 mex67::HIS3 edc3::LEU2 pRS316-URA3-MEX67</i>                  | This study                  |
| SY605        | <i>MATa ade2 his3 15 leu2 trp1 ura3 mex67::HIS3 edc3::LEU2 pRS314-mex67-5</i>                          | This study                  |
| SY749        | <i>MATa ade2 his3 15 leu2 trp1 ura3 mex67::HIS3 edc3::LEU2 upf1::URA3 pRS314-mex67-5</i>               | This study                  |
| SY1913       | <i>MATa ade2 his3 15 leu2 trp1 ura3 mex67::HIS3 edc3::LEU2 dop1::ADE2 pRS314-mex67-5</i>               | This study                  |
| SY1920       | <i>MATa ade2 his3 15 leu2 trp1 ura3 mex67::HIS3 edc3::LEU2 xrm1::ADE2 pRS314-mex67-5</i>               | This study                  |
| L40          | <i>MATa ade2 his3D200 leu2-3,112 trp1-901 LYS2::(lexAop)4-HIS3 URA3::(lexAop)8lacZ gal4 gal80</i>      | Stanley Hollenberg          |

**Table 2S. Plasmids used in this study**

| Name             | Allele                           | Description                                                                                                                    |
|------------------|----------------------------------|--------------------------------------------------------------------------------------------------------------------------------|
| SYE22            | pRS408*-rpb1-1(-XbaI)            | Contains the ts rpb1-1 allele as an 4.0 kb EcoRI-HindIII fragment                                                              |
| SYE26            | Bs-ski7::URA3                    | Contains the ski7::URA3 null allele as a NotI-SalI fragment                                                                    |
| SYE28            | Bs-ski7::ADE2                    | Contains the ski7::ADE2 null allele as a NotI-SalI fragment                                                                    |
| SYE200           | Bs-edc3::LEU2                    | Contains the edc3::LEU2 null allele as a NotI-SalI fragment                                                                    |
| CFE7             | Bs-edc3::URA3                    | Contains the edc3::URA3 null allele as a NotI-SalI fragment                                                                    |
| HFE1397          | Bs-upf1-1::URA3<br>Bs-rrp6::LEU2 | Contains the upf1::URA3 null allele as a NotI-SalI fragment<br>Contains the rrp6::LEU2 null allele as a HindIII-BamHI fragment |
| SYE44 (PIA278-1) | pRS314-YRA1                      | Contains wild-type YRA1 allele as a 2.0 kb BamHI-XhoI fragment                                                                 |
| SYE46(PIA286-1)  | pRS314-YRA1-ΔIVS                 | Same as SYE44 but lacks the <i>YRA1</i> intron                                                                                 |
| SYE58            | pRS316-YRA1                      | Contains wild-type YRA1 allele as a 3.0 kb HindIII-SacI fragment                                                               |
| SYE60            | pRS314-yra1-1                    | Contains the yra1-1 allele as a 3.0 kb HindIII-SacI fragment                                                                   |
| SYE181(pFS2261)  | YepLac112-Myc-YRA2               | Contains Myc-tagged <i>YRA2</i> allele as a 1.7 kb BamHI-BamHI fragment                                                        |
| SYE70            | pRS316-YRA1 (HindIII-SacI)       | Contains wild-typ YRA1 allele as a 2.2 Kb HindIII-SacI fragment                                                                |
| SYE74            | pRS314-YRA1(XhoI-SacI)           | Contains wild-typ YRA1 allele as a 2.2 Kb XhoI-SacI fragment                                                                   |
| SYE80            | pRS314-YRA1-C-Y-Y                | Same as in SYE74 but the 382-nt YRA1exon 1 was replaced by the 83-nt CYH2 exon1                                                |
| SYE82            | pRS314-YRA1-M-Y-Y                | Same as in SYE74 but the 382-nt YRA1exon 1was replaced by the 385-nt MER2 exon1                                                |
| SYE507           | pRS314-YRA1-H-Y-Y                | Same as in SYE74 but the 285-nt coding region of YRA1exon 1was replaced by the 863-nt HIS3 coding re                           |
| SYE474           | pRS314-YRA1-exon1-reverse        | Same as in SYE74 but the last 288 nts of YRA1exon 1 was replaced by its complementary sequences                                |
| SYE84            | pRS314-YRA1-Y-C-Y                | Same as in SYE74 but the 788-nt YRA1 intron was replaced by the 511-nt CYH2 intron                                             |
| SYE87            | pRS314-YRA1-Y-M-Y                | Same as in SYE74 but the 788-nt YRA1 intronwas replaced by the 80-nt MER2 intron                                               |
| SYE90            | pRS314-YRA1-Y-R-Y                | Same as in SYE74 but the 788-nt YRA1 intronwas replaced by the 398-nt RPS51A intron                                            |
| SYE92            | pRS314-YRA1-Y-Y-C                | Same as in SYE74 but the 688-nt YRA1 exon 2 was replaced by the 485-nt CYH2 exon2                                              |
| SYE92            | pRS314-YRA1-Y-Y-M                | Same as in SYE74 but the 688-nt YRA1 exon2 was replaced by the 827-nt MER2 exon2                                               |
| SYE93            | pRS314-YRA1-Y-Y-R                | Same as in SYE74 but the 688-nt YRA1 exon2 was replaced by the 529-nt RPS51A exon2                                             |
| SYE73            | pRS314-YRA1-N84                  | Same as in SYE74 but contains an internal deletion from A.A. 2 to 85 in exon1                                                  |
| SYE137           | pRS314-YRA1-DE-C110              | Same as in SYE74 but contains an internal deletion from A.A. 11 to 85 in exon1                                                 |
| SYE139           | pRS314-YRA1-DE-C120              | Same as in SYE74 but contains an internal deletion from A.A. 21 to 85 in exon1                                                 |
| SYE141           | pRS314-YRA1-DE-C130              | Same as in SYE74 but contains an internal deletion from A.A. 31 to 85 in exon1                                                 |
| SYE143           | pRS314-YRA1-DE-C140              | Same as in SYE74 but contains an internal deletion from A.A. 41 to 85 in exon1                                                 |
| SYE146           | pRS314-YRA1-DE-C150              | Same as in SYE74 but contains an internal deletion from A.A. 51 to 85 in exon1                                                 |
| SYE147           | pRS314-YRA1-DE-C160              | Same as in SYE74 but contains an internal deletion from A.A. 61 to 85 in exon1                                                 |
| SYE149           | pRS314-YRA1-DE-C170              | Same as in SYE74 but contains an internal deletion from A.A. 71 to 85 in exon1                                                 |
| SYE151           | pRS314-YRA1-DE-C180              | Same as in SYE74 but contains an internal deletion from A.A. 81 to 85 in exon1                                                 |
| SYE374           | pRS314-YRA1-DI-R1-F7             | Same as SYE74 but contains a 461-nt internal deletion from nts 27 to 467 of YRA1 intron                                        |
| SYE78            | pRS314-YRA1-DE2                  | Same as SYE74 but contains a deletion of first 351nts of YRA1exon2                                                             |
| SYE160           | pRS314-YRA1-AUA                  | Same as in SYE74 but contains AUG to AUA mutation in the transaltion initiation codon                                          |
| SYE161           | pRS314-YRA1-AUC                  | Same as in SYE74 but contains AUG to AUC mutation in the transaltion initiation codon                                          |
| SYE163           | pRS314-YRA1-AUU                  | Same as in SYE74 but contains AUG to AUU mutation in the transaltion initiation codon                                          |
| SYE240           | pRS316-YRA1-AUA                  | Same as in SYE74 but contains AUG to AUA mutation in the transaltion initiation codon                                          |
| SYE298           | pRS314-YRA1-m5SS                 | Same as in SYE74 but contains GUAUGU to GUAUUAU mutation in the 5' splicing site                                               |
| SYE300           | pRS314-YRA1-m3SS                 | Same as in SYE74 but contains AG to UC mutation in the 3' splicing site                                                        |
| SYE302           | pRS314-YRA1-mBB2                 | Same as in SYE74 but contains UGACUAAC to UGACUACC mutation in the branchpoint region                                          |
| SYE416           | pRS314-YRA1-N84-m5SS             | Same as in SYE73 but contains GUAUGU to GUAUUAU mutation in the 5' splicing site                                               |
| SYE417           | pRS314-YRA1-N84-m3SS             | Same as in SYE73 but contains AG to UC mutation in the 3' splicing site                                                        |
| SYE419           | pRS314-YRA1-N84-mBB2             | Same as in SYE73 but contains UGACUAAC to UGACUACC mutation in the branchpoint region                                          |
| SYE516           | pRS316-YRA1-AUA-m5SS             | Same as in SYE240 but contains GUAUGU to GUAUUAU mutation in the 5' splicing site                                              |
| SYE517           | pRS316-YRA1-AUA-m3SS             | Same as in SYE240 but contains AG to UC mutation in the 3' splicing site                                                       |
| SYE519           | pRS316-YRA1-AUA-mBB2             | Same as in SYE240 but contains UGACUAAC to UGACUACC mutation in the branchpoint region                                         |
| SYE234           | pGAD-C2-EDC3-FL                  | Contains the entire EDC3 coding region as an EcoR-SalI fragment                                                                |
| SYE324           | pBTM116-CRM1-FL                  | Contains the entire CRM1 coding region as an EcoR-SalI fragment                                                                |

**Table 3S. Oligonucleotides used in this study**

| Name        | Sequences                                                          |
|-------------|--------------------------------------------------------------------|
| YRA1-1      | AACCAAAGAGAGAAAAGCCTGCTAA                                          |
| YRA1-2      | GATCGAGCTCTGAGGACCATCAATTAGTAAG                                    |
| YRA1-3      | ACTTGAAGAACTATAAAAGGCCGC                                           |
| YRA1-4      | GTGTGCCATATCCTTCCTTACAAA 3'                                        |
| YRA1-5      | GTATGTTAATACGTGAAATGAGAGCT                                         |
| YRA1-6      | GAGTTGCCAAGCTCTTGACACCCACTA                                        |
| YRA1-5-R    | TTCGTCTAAGGATTTATCTAAGTTAGC                                        |
| YRA1-7-R    | GCAGATGTAGGTATTTTCTTAATATGG                                        |
| Y-C-1A      | TCGTGTGTTTAGTAGTAGGTTTTTTTGTGAGAAGAAGTTTATTAAATCCCAGAACAATCATCCAA  |
| Y-C-1B      | GTAACATAAACAATAGCTCTCATTTCACGTATTAACATACTGAGACGTGACCTCTGTGCTTTTCTA |
| Y-C-2A      | CGAAGGTTTGCCAAGGGACATTAAGCAGGATGCTGTAAGAGTATGTAGTTCCATTTGGAAGAGGG  |
| Y-C-2B      | AAACTCTTTGAACACCACCTACTTGAGATGCAAAAAATTCCTGTACAAAAAATATTGTAATGA    |
| Y-C-3A      | TCATAGAGATATGACTAACTTTTTTTTTTTTATTATAGGGTAAAGGTCGTATCGGTAAGCACA    |
| Y-C-3B      | GACATATTATGAGTCAAATATGCCGAATAAACTTTAAAAGGAAATAATACAGAAGTATGTTGA    |
| Y-M-1A      | TCGTGTGTTTAGTAGTAGGTTTTTTTGTGAGAAGAAGTTTTCAACAAGAACAGAAAAGGAAAA    |
| Y-M-1B      | GTAACATAAACAATAGCTCTCATTTCACGTATTAACATACTGCTAGCAGCATCTTGTCCAGT     |
| Y-M-2A      | CGAAGGTTTGCCAAGGGACATTAAGCAGGATGCTGTAAGAGTTCGTACCAACACAGTGCATACCC  |
| Y-M-2B      | AAACTCTTTGAACACCACCTACTTGAGATGCAAAAAATTCCTATACTACAGTTGTTAGTAAATGT  |
| Y-M-3A      | TCATAGAGATATGACTAACTTTTTTTTTTTTATTATAGAAGCTGAAAACCTTAATAAAGGATT    |
| Y-M-3B      | GACATATTATGAGTCAAATATGCCGAATAAACTTTAAAAGCAACTGGCGTGGTTTTTCATTGTAG  |
| Y-R-2A      | CGAAGGTTTGCCAAGGGACATTAAGCAGGATGCTGTAAGAGTATGTTAATATGGACTAAAGGAGG  |
| Y-R-2B      | AAACTCTTTGAACACCACCTACTTGAGATGCAAAAAATTCCTATTAATGACGAAAAGCAATAC    |
| Y-R-3A      | TCATAGAGATATGACTAACTTTTTTTTTTTTATTATAGGGTAGAGTTAGAACCAAGACCGTCA    |
| Y-R-3B      | GACATATTATGAGTCAAATATGCCGAATAAACTTTAAAAGAATTAGTAAATATAATAATTTTT    |
| Y-H-F1      | TTTAAGAAATCCATATTAAGAAAATACCTACATCTGCTAAATGACAGAGCAGAAAAGCCCTAGTAA |
| Y-H-R1      | GTAACATAAACAATAGCTCTCATTTCACGTATTAACATACTACATAAGAACACCTTTGGTGGAG   |
| YRA1-Ex1R-F | CTTTAAGAAATCCATATTAAGAAAATACCTACATCTGCTATCTTACAGCATCCTGCTTAATGTCC  |
| YRA1-Ex1R-R | GTAACATAAACAATAGCTCTCATTTCACGTATTAACATACAATGTCTGCTAACTTAGATAAATCC  |
| YRA1-DE1-5' | GATCCCTGAGGGTATATTAAGCTATTTTACCCT                                  |
| YRA1-DE1-3' | GATCCCTTGGCATTAGCAGATGTAGGTATTTTCT                                 |
| YRA1-CI10   | GATCCCTTGGGTCTAAGGATTTATCTAAGTTAGCA                                |
| YRA1-CI20   | GATCCCTTGGACTTCCTGCTTTGTTAGAGCCAATG                                |
| YRA1-CI30   | GATCCCTTGGACCACGAGTACCACCGACACGGGCT                                |
| YRA1-CI40   | GATCCCTTGGAACTTGCTTACCAACTCTTCTTGGG                                |
| YRA1-CI50   | GATCCCTTGGTCTGTTTGGAAAGGCTCCTACGTTGG                               |
| YRA1-CI60   | GATCCCTTGGTGCCCTAGTATTTTTTCTGATAGGG                                |
| YRA1-CI70   | GATCCCTTGGCTTGGCAACTCTAGCGACTGCGTTT                                |
| YRA1-CI80   | GATCCCTTGGGACCTTGACCTCTCTAGTGGTGTCC                                |
| YRA1-DI-3'  | AATCTTGATCTGCCTCCATCGATTG                                          |
| YRA1-DI-F7  | GATCGAATTCTAGCTATGGGAAACATGTCTTTCAT                                |
| YRA1-DI-R1  | GATCGAATTCAGCTCTCATTTCACGTATTAACATA                                |
| YRA1-DE2-5' | TGATCAAGAATTCTCTTTTTAGAGA                                          |
| YRA1-DE2-3' | GATCAGATCTTCTATAATAAAAAAAAAAAGTTA                                  |
| YRA1-mAUU-F | AATACCTACATCTGCTAAATTTCTGCTAACTTAGATAAATC                          |

|               |                                                 |
|---------------|-------------------------------------------------|
| YRA1-mAUU-R   | GATTTATCTAAGTTAGCAGAAATTTAGCAGATGTAGGTATT       |
| YRA1-mAUC-F   | AATACCTACATCTGCTAAATCTCTGCTAACTTAGATAAATC       |
| YRA1-mAUC-R   | GATTTATCTAAGTTAGCAGAGATTTAGCAGATGTAGGTATT       |
| YRA1-mAUA-F   | AATACCTACATCTGCTAAATATCTGCTAACTTAGATAAATC       |
| YRA1-mAUA-R   | GATTTATCTAAGTTAGCAGATATTTAGCAGATGTAGGTATT       |
| YRA1-m5SS-F   | GCAGGATGCTGTAAGAGTATATTAATACGTGAAATGAGAGC       |
| YRA1-m5SS-R   | GCTCTCATTTCACGTATTAATATACTCTTACAGCATCCTGC       |
| YRA1-mBB2-F   | ATCATAGAGATATATGACTACCTTTTTTTTTTTTATTATAG       |
| YRA1-mBB2-R   | CTATAATAAAAAAAAAAAGGTAGTCATATATCTCTATGAT        |
| YRA1-m3SS-F   | AACTTTTTTTTTTTTATTATTCGAATTTTTTGCATCTCAAGT      |
| YRA1-m3SS-R   | ACTTGAGATGCAAAAAATTCGAATAATAAAAAAAAAAAGTT       |
| yra1-2-r      | CGCCATTTCTTGCCAGATCTTC                          |
| YRA1-m1       | GATGCAAAAAATTCTCTTACAGCATCC                     |
| YRA1-p1       | AGCTCTCATTTCACGTATTAACATAC                      |
| YRA1-D-3UTR-1 | CATCGCACTGTAAATAGTGACATATTATGA                  |
| YRA1-D-3UTR-2 | ACGAGTAACACACGTTTAATCAACCTATCC                  |
| YRA1-1-r      | TCGAGGGCAGACAAATACGCCAGCT                       |
| YRA1-IN-1     | AAACTCGAGAGAGGTCAAGGTCAACGTCAAGG                |
| YRA1-IN-2     | GGGAAGCTTGTATAACTCAACAAAATCTTTG                 |
| YRA1-DI-5'    | GATCGAATTCCTCCTTGATTGTTTGTGATTGTCC              |
| YEL015W-1     | AATTGCGGCCGCGTCAACAGGTTGCTCGAAAAGAAGCA          |
| YEL015W-2     | AGAGGATCCTATGGTTTCTTTACGAATTACTGTATTGT          |
| EDC3-DS-2A    | GATCGGATCCTCTAGATATGGTTTCTTTACGAATTACTGTATTG    |
| YEL015W-3     | AGAGGATCCAACATCGATACCAAGAATTACTTTAGCCTAACTGGATA |
| EDC3-DS-3A    | GATCGGATCCCTCGAGACCAAGAATTACTTTAGCCTAACTGGAT    |
| YEL015W-4     | AATTGTCGACGCTCAGTTCTGTCTTCGTAGGATTGG            |
| CRM1-TH-F1    | GATCGAATTCATGGAAGGAATTTGGATTTTCTAACGAC          |
| CRM1-TH-C1    | GATCGTCGACCTAATCATCAAGTTCGGAAGGTTTAATAA         |
| CRM1-F-S1     | AGTTGAGCCATTATTGAACGCTGT                        |
| CRM1-F-S2     | AGGCAAATCGATGGTTCCGAATGG                        |
| CRM1-R-S1     | GTCCAAAGTGCAATCAATACACTC                        |
| DBP2-2-r      | CTCTGTTACCCAGCCACCATCTC                         |
| RPS28B        | CGCAAACGACGAGCTTCACGTTCA                        |
| MER2-P        | TGAGGGTATGCACTGTGTTGGTACGAAC                    |
| MER2-exon1-F  | ATGGTCGCTAGAGGTAGAACAGACGAGA                    |
| MER2-exon1-R  | CGTTCGTAGCAGCATCTTGTCCAGTAG                     |
| MER2-exon2-F  | GAAACGTGAAAACCTTAATAAAGGATTT                    |
| MER2-exon2-R  | TCACAGCTCAGATTCCAGAGTGTCCGGT                    |
| 18S           | CATGGCTTAATCTTTGAGAC                            |
| RRP6-1        | CCCGGAATTCCTCAAAAATATGAGGGCATCGG                |
| RRP6-2        | CTAGTCTAGATTGAGCGAAGTATAATCCTGC                 |

---

**Table 4S. Transcripts Differentially Expressed in *edc3Δ* Cells**

| Probe set  | ORF     | Gene   | A-WT   | A- <i>edc3</i> | B-WT   | B- <i>edc3</i> | C-WT   | C- <i>edc3</i> | E-WT   | E- <i>edc3</i> | G-WT   | G- <i>edc3</i> |
|------------|---------|--------|--------|----------------|--------|----------------|--------|----------------|--------|----------------|--------|----------------|
|            |         |        | Signal | Signal         |
| 6078_at    | YDR381W | YRA1   | 622.5  | 944.9          | 801.4  | 1092           | 644.3  | 1038.9         | 568.4  | 1010.9         | 568.3  | 961.1          |
| 6079_at    | YDR381W | YRA1   | 585.1  | 1158           | 561.2  | 944.7          | 645.4  | 1040.5         | 593.6  | 1165.5         | 578.5  | 1209.1         |
| 10069_f_at | YLR264W | RPS28B | 2214   | 2722.5         | 2219.4 | 2966.9         | 2221.2 | 2744.2         | 2090.5 | 3027.8         | 2013.6 | 2799.1         |
| 10068_i_at | YLR264W | RPS28B | 4649.6 | 4855.4         | 4040.4 | 4755.4         | 4869.1 | 5681.9         | 4692.4 | 6727.4         | 4337.1 | 5260.2         |
| 5732_at    | YEL015W | EDC3   | 473.6  | 10             | 480.5  | 10             | 466.8  | 10             | 465.4  | 10             | 456.8  | 10             |
| 10796_at   | YKL216W | URA1   | 1838.5 | 786.6          | 1963.9 | 1019           | 1805.3 | 831.3          | 1649.7 | 827.3          | 1620.7 | 857.9          |
| 9911_at    | YLR420W | URA4   | 790.5  | 544.9          | 826.8  | 577.2          | 780.1  | 574.8          | 741.1  | 466.5          | 750.2  | 471.1          |

Five independent expression profiling experiments were carried out with wild-type (*EDC3*) and *edc3Δ* strains. Our data analysis indicates that only five transcripts (represented by seven probe sets) are differentially expressed in the *edc3Δ* strain. The raw signal values of each of these probe sets in different experiments (A, B, C, E, and G) are shown in the table.

## Table 5S. Micorarray Data

This table is located at

<http://jacobsonlab.umassmed.edu/cgi-bin/pubcontents.cgi?pubcontents=2006-Feng>.

## References

- Denis-Duphil, M. (1989). Pyrimidine biosynthesis in *Saccharomyces cerevisiae*: the *ura2* cluster gene, its multifunctional enzyme product, and other structural or regulatory genes involved in de novo UMP synthesis. *Biochem Cell Biol* 67, 612-631.
- Guthrie, C., and Fink, G. R. (1991). *Methods in Enzymology: Molecular Biology of Saccharomyces cerevisiae.*, Vol 194 (NY, Academic Press).
- He, F., Brown, A. H., and Jacobson, A. (1996). Interaction between Nmd2p and Upf1p is required for activity but not for dominant-negative inhibition of the nonsense-mediated mRNA decay pathway in yeast. *RNA* 2, 153-170.
- He, F., Brown, A. H., and Jacobson, A. (1997). Upf1p, Nmd2p, and Upf3p are interacting components of the yeast nonsense-mediated mRNA decay pathway. *Mol Cell Biol* 17, 1580-1594.
- He, F., and Jacobson, A. (1995). Identification of a novel component of the nonsense-mediated mRNA decay pathway by use of an interacting protein screen. *Genes Dev* 9, 437-454.
- He, F., Li, X., Spatrack, P., Casillo, R., Dong, S., and Jacobson, A. (2003). Genome-wide analysis of mRNAs regulated by the nonsense-mediated and 5' to 3' mRNA decay pathways in yeast. *Mol Cell* 12, 1439-1452.
- Lecompte, O., Ripp, R., Thierry, J.-C., Moras, D., and Poch, O. (2002). Comparative analysis of ribosomal proteins in complete genomes: an example of reductive evolution at the domain scale. *Nucl Acids Res* 30, 5382-5390.
- Portman, D. S., O'Connor, J. P., and Dreyfuss, G. (1997). YRA1, an essential *Saccharomyces cerevisiae* gene, encodes a novel nuclear protein with RNA annealing activity. *RNA* 3, 527-537.
- Strasser, K., and Hurt, E. (2000). Yra1p, a conserved nuclear RNA-binding protein, interacts directly with Mex67p and is required for mRNA export. *Embo J* 19, 410-420.
